# Supplementary material for: Mutant GDF15 presents a poor prognostic outcome for patients with oral squamous cell carcinoma
Source: PubMed Central journal article supplement (PMC4811520; doi:10.18632/oncotarget.6017), 2015-10-19
Supplement: oncotarget-07-2113-s001.pdf [file oncotarget-07-2113-s001.pdf]

## SUPPLEMENTARY TABLES

Supplementary Table S1: GDF15 mutations in 19 patients with oral squamous cell carcinoma

| case | locus          | type | ref | length | genotype | p value  | coverage | allele coverage | location | function   | codon | exon | protein     |
|------|----------------|------|-----|--------|----------|----------|----------|-----------------|----------|------------|-------|------|-------------|
| 1    | chr19:18497120 | SNV  | C   | 1      | C/A      | 3.16E-07 | 1821     | 1733,88         | exonic   | missense   | ACG   | 1    | p.Pro41Thr  |
| 2    | chr19:18499150 | SNV  | C   | 1      | C/T      | 6.31E-07 | 81       | 78,3            | exonic   | missense   | CTC   | 2    | p.Pro111Leu |
| 3    | chr19:18499359 | SNV  | G   | 1      | G/A      | 0.048306 | 50       | 47,3            | exonic   | missense   | AAG   | 2    | p.Glu181Lys |
| 4    | chr19:18499428 | SNV  | C   | 1      | C/T      | 0.029512 | 115      | 109,6           | exonic   | missense   | TCG   | 2    | p.Pro204Ser |
| 5    | chr19:18499474 | SNV  | C   | 1      | C/T      | 6.31E-07 | 1374     | 877497          | exonic   | missense   | TTG   | 2    | p.Ser219Leu |
| 6    | chr19:18497031 | SNV  | G   | 1      | G/A      | 5.01E-07 | 82       | 79,3            | exonic   | missense   | GAC   | 1    | p.Gly11Asp  |
| 7    | chr19:18497004 | SNV  | C   | 1      | C/T      | 6.31E-07 | 99       | 94,5            | exonic   | missense   | CTC   | 1    | p.Pro2Leu   |
|      | chr19:18499374 | SNV  | C   | 1      | C/T      | 6.31E-07 | 15       | 12,3            | exonic   | missense   | TCG   | 2    | p.Pro186Ser |
|      | chr19:18499377 | SNV  | C   | 1      | C/T      | 6.31E-07 | 15       | 12,3            | exonic   | nonsense   | TAA   | 2    | p.Gln187Ter |
| 8    | chr19:18499273 | SNV  | C   | 1      | C/T      | 6.31E-07 | 1129     | 1093,36         | exonic   | missense   | GTG   | 2    | p.Ala152Val |
|      | chr19:18499370 | SNV  | G   | 1      | G/A      | 6.31E-07 | 227      | 218,9           | exonic   | synonymous | TTA   | 2    | p.(=)*      |
|      | chr19:18499409 | SNV  | G   | 1      | G/A      | 6.31E-07 | 249      | 240,9           | exonic   | synonymous | GCA   | 2    | p.(=)*      |
| 9    | chr19:18499199 | SNV  | G   | 1      | G/A      | 6.31E-07 | 111      | 106,5           | exonic   | synonymous | CTA   | 2    | p.(=)*      |
| 10   | chr19:18499116 | SNV  | C   | 1      | C/T      | 6.31E-07 | 110      | 106,4           | exonic   | missense   | TAC   | 2    | p.His100Tyr |
| 11   | chr19:18499166 | SNV  | G   | 1      | G/A      | 6.31E-07 | 158      | 153,5           | exonic   | synonymous | GAA   | 2    | p.(=)*      |
|      | chr19:18499198 | SNV  | T   | 1      | T/C      | 6.31E-07 | 133      | 127,6           | exonic   | missense   | CCG   | 2    | p.Leu127Pro |
|      | chr19:18499202 | SNV  | C   | 1      | C/G      | 6.31E-07 | 130      | 122,8           | exonic   | synonymous | TCG   | 2    | p.(=)*      |
| 12   | chr19:18497231 | SNV  | A   | 1      | A/G      | 6.31E-07 | 757      | 733,24          | exonic   | missense   | GCC   | 1    | p.Thr78Ala  |
| 13   | chr19:18497004 | SNV  | C   | 1      | C/T      | 6.31E-07 | 377      | 365,12          | exonic   | missense   | CTC   | 1    | p.Pro2Leu   |
| 14   | chr19:18499463 | SNV  | G   | 1      | G/A      | 6.31E-07 | 160      | 155,5           | exonic   | synonymous | ACA   | 2    | p.(=)*      |
| 15   | chr19:18499345 | SNV  | C   | 1      | C/T      | 0.049317 | 76       | 72,4            | exonic   | missense   | GTA   | 2    | p.Ala176Val |
| 16   | chr19:18497006 | SNV  | G   | 1      | G/A      | 6.31E-07 | 79       | 76,3            | exonic   | missense   | AGG   | 1    | p.Gly3Arg   |
| 17   | chr19:18499201 | SNV  | C   | 1      | C/T      | 6.31E-07 | 110      | 106,4           | exonic   | missense   | TTC   | 2    | p.Ser128Phe |
|      | chr19:18499418 | SNV  | G   | 1      | G/A      | 6.31E-07 | 215      | 208,7           | exonic   | synonymous | GGA   | 2    | p.(=)*      |
| 18   | chr19:18497032 | SNV  | C   | 1      | C/T      | 3.16E-07 | 574      | 553,21          | exonic   | synonymous | GGT   | 1    | p.(=)*      |

(Continued)

| case | locus          | type | ref | length | genotype | p value  | coverage | allele coverage | location | function   | codon | exon | protein     |
|------|----------------|------|-----|--------|----------|----------|----------|-----------------|----------|------------|-------|------|-------------|
|      | chr19:18497217 | SNV  | G   | 1      | G/A      | 6.31E-07 | 479      | 456,23          | exonic   | nonsense   | TAG   | 1    | p.Trp73Ter  |
|      | chr19:18499692 | SNV  | G   | 1      | G/A      | 6.31E-07 | 550      | 518,32          | exonic   | missense   | ATG   | 2    | p.Val292Met |
|      | chr19:18499694 | SNV  | G   | 1      | G/A      | 6.31E-07 | 551      | 529,22          | exonic   | synonymous | GTA   | 2    | p.(=)*      |
| 19   | chr19:18499728 | SNV  | G   | 1      | G/A      | 6.31E-08 | 622      | 487135          | exonic   | missense   | AAC   | 2    | p.Asp304Asn |

\*p.(=): synonymous mutation

**Supplementary Table S2: Multivariate Cox model analysis with missense GDF15 mutation, TNM staging, pathologic differentiation grade, smoking status and alcohol use**

| Characteristics                                           | HR     | 95% CI       | P value |
|-----------------------------------------------------------|--------|--------------|---------|
| <b>Overall survival</b>                                   |        |              |         |
| Missense GDF15 mutation (yes vs. no)                      | 14.008 | 3.216–61.010 | <0.001  |
| TNM staging (stage III vs. stage IVA)                     | 0.831  | 0.186–3.717  | 0.808   |
| Pathological differentiation (Well vs. moderately/poorly) | 0.330  | 0.084–1.292  | 0.111   |
| Smoking status (never vs. current/former)                 | 0.623  | 0.142–2.728  | 0.530   |
| Alcohol use (negative vs. positive)                       | 1.222  | 0.300–4.982  | 0.780   |
| <b>Disease-free survival</b>                              |        |              |         |
| Missense GDF15 mutation (yes vs. no)                      | 7.102  | 1.898–26.566 | 0.004   |
| TNM staging (stage III vs. stage IVA)                     | 0.739  | 0.204–2.675  | 0.645   |
| Pathological differentiation (Well vs. moderately/poorly) | 0.402  | 0.121–1.339  | 0.138   |
| Smoking status (never vs. current/former)                 | 1.428  | 0.384–5.305  | 0.595   |
| Alcohol use (negative vs. positive)                       | 0.592  | 0.158–2.216  | 0.436   |
| <b>Locoregional recurrence-free survival</b>              |        |              |         |
| Missense GDF15 mutation (yes vs. no)                      | 7.955  | 1.974–32.068 | 0.004   |
| TNM staging (stage III vs. stage IVA)                     | 0.558  | 0.131–2.372  | 0.429   |
| Pathological differentiation (Well vs. moderately/poorly) | 0.472  | 0.135–1.656  | 0.241   |
| Smoking status (never vs. current/former)                 | 0.814  | 0.213–3.107  | 0.763   |
| Alcohol use (negative vs. positive)                       | 1.102  | 0.292–4.154  | 0.886   |
| <b>Distant metastasis-free survival</b>                   |        |              |         |
| Missense GDF15 mutation (yes vs. no)                      | 9.914  | 2.565–38.322 | 0.001   |
| TNM staging (stage III vs. stage IVA)                     | 1.045  | 0.283–3.863  | 0.947   |
| Pathological differentiation (Well vs. moderately/poorly) | 0.313  | 0.088–1.113  | 0.073   |
| Smoking status (never vs. current/former)                 | 1.162  | 0.292–4.623  | 0.831   |
| Alcohol use (negative vs. positive)                       | 0.610  | 0.157–2.381  | 0.477   |

Supplementary Table S3: TP53 mutations in 34 patients with oral squamous cell carcinoma

| case | locus         | type  | ref   | length | genotype | p value  | coverage | allele coverage | location | function             | codon | exon | protein      |
|------|---------------|-------|-------|--------|----------|----------|----------|-----------------|----------|----------------------|-------|------|--------------|
| 1    | chr17:7578203 | SNV   | C     | 1      | C/T      | 1.00E-10 | 1997     | 522,1475        | exonic   | missense             | ATG   | 6    | p.Val216Met  |
| 2    | chr17:7578479 | SNV   | G     | 1      | G/T      | 6.31E-07 | 1995     | 1475,520        | exonic   | missense             | ACC   | 5    | p.Pro151Thr  |
| 3    | chr17:7578406 | SNV   | C     | 1      | C/T      | 6.31E-07 | 162      | 90,72           | exonic   | missense             | CAC   | 5    | p.Arg175His  |
| 4    | chr17:7574018 | SNV   | G     | 1      | G/A      | 1.26E-06 | 1733     | 1277,456        | exonic   | missense             | TGC   | 10   | p.Arg337Cys  |
|      | chr17:7577094 | SNV   | G     | 1      | G/A      | 6.31E-07 | 1997     | 1490,507        | exonic   | missense             | TGG   | 8    | p.Arg282Trp  |
| 5    | chr17:7578526 | SNV   | C     | 1      | C/A      | 2.51E-07 | 1981     | 682,1299        | exonic   | missense             | TTC   | 5    | p.Cys135Phe  |
| 6    | chr17:7576889 | INDEL | CT    | 1      | CT/C     | 5.01E-07 | 1145     | 286,859         | exonic   | frame shift deletion | AGA   | 9    | p.Lys319fs** |
| 7    | chr17:7578454 | SNV   | G     | 1      | G/A      | 1.26E-07 | 438      | 421,17          | exonic   | missense             | GTC   | 5    | p.Alal59Val  |
| 8    | chr17:7579349 | SNV   | A     | 1      | A/C      | 6.31E-07 | 1996     | 1041,892        | exonic   | missense             | TGC   | 4    | p.Phe113Cys  |
| 9    | chr17:7577120 | SNV   | C     | 1      | C/T      | 5.01E-07 | 2000     | 433,1567        | exonic   | missense             | CAT   | 8    | p.Arg273His  |
| 10   | chr17:7577538 | SNV   | C     | 1      | C/T      | 6.31E-07 | 1999     | 1157,842        | exonic   | missense             | CAG   | 7    | p.Arg248Gln  |
|      | chr17:7578403 | SNV   | C     | 1      | C/A      | 2.51E-06 | 959      | 568,391         | exonic   | missense             | TTC   | 5    | p.Cys176Phe  |
| 11   | chr17:7577094 | SNV   | G     | 1      | G/A      | 1.00E-07 | 274      | 119,155         | exonic   | missense             | TGG   | 8    | p.Arg282Trp  |
| 12   | chr17:7578271 | SNV   | T     | 1      | T/A      | 3.16E-07 | 1985     | 359,1626        | exonic   | missense             | CTT   | 6    | p.His193Leu  |
| 13   | chr17:7578394 | INDEL | TGGTG | 4      | TGGTG/T  | 6.31E-07 | 1813     | 621,1192        | exonic   | frame shift deletion | ATG   | 5    | p.His178fs*  |
| 14   | chr17:7579529 | SNV   | C     | 1      | C/T      | 7.94E-09 | 1999     | 164,1835        | exonic   | nonsense             | TAG   | 4    | p.Trp53Ter   |
| 15   | chr17:7577548 | SNV   | C     | 1      | C/T      | 2.51E-06 | 1999     | 554,1445        | exonic   | missense             | AGC   | 7    | p.Gly245Ser  |
| 16   | chr17:7578475 | SNV   | G     | 1      | G/A      | 1.58E-07 | 1950     | 452,1498        | exonic   | missense             | CTG   | 5    | p.Pro152Leu  |
| 17   | chr17:7576860 | SNV   | G     | 1      | G/A      | 1.00E-07 | 83       | 79,4            | exonic   | missense             | ATC   | 9    | p.Thr329Ile  |
| 18   | chr17:7578394 | SNV   | T     | 1      | T/A      | 6.31E-07 | 48       | 23,25           | exonic   | missense             | CTT   | 5    | p.His179Leu  |
| 19   | chr17:7578190 | SNV   | T     | 1      | T/C      | 2.00E-08 | 1995     | 422,1573        | exonic   | missense             | TGT   | 6    | p.Tyr220Cys  |
|      | chr17:7579869 | SNV   | C     | 1      | C/A      | 1.26E-05 | 1984     | 1793,191        | exonic   | missense             | ATT   | 2    | p.Ser15Ile   |

(Continued)

| case | locus         | type  | ref  | length | genotype | p value  | coverage | allele coverage | location | function                 | codon | exon | protein     |
|------|---------------|-------|------|--------|----------|----------|----------|-----------------|----------|--------------------------|-------|------|-------------|
| 20   | chr17:7576855 | SNV   | G    | 1      | G/A      | 7.94E-06 | 1955     | 1087,868        | exonic   | nonsense                 | TAG   | 9    | p.Gln331Ter |
| 21   | chr17:7577124 | SNV   | C    | 1      | C/G      | 1.00E-10 | 1636     | 350,1286        | exonic   | missense                 | CTG   | 8    | p.Val272Leu |
| 22   | chr17:7578526 | SNV   | C    | 1      | C/T      | 2.00E-07 | 610      | 103,507         | exonic   | missense                 | TAC   | 5    | p.Cys135Tyr |
| 23   | chr17:7578478 | SNV   | G    | 1      | G/T      | 6.31E-07 | 1667     | 500,1167        | exonic   | missense                 | CAC   | 5    | p.Pro151His |
| 24   | chr17:7578211 | SNV   | C    | 1      | C/T      | 3.16E-07 | 1995     | 428,1567        | exonic   | missense                 | CAA   | 6    | p.Arg213Gln |
| 25   | chr17:7574003 | SNV   | G    | 1      | G/A      | 2.51E-06 | 1348     | 477,871         | exonic   | nonsense                 | TGA   | 10   | p.Arg342Ter |
| 26   | chr17:7577082 | SNV   | C    | 1      | C/T      | 7.94E-08 | 1622     | 989,633         | exonic   | missense                 | AAA   | 8    | p.Glu286Lys |
|      | chr17:7578274 | INDEL | TGAG | 3      | TGAG/T   | 2.00E-10 | 1970     | 1125,845        | exonic   | non-frame shift deletion |       | 6    | p.Pro191del |
| 27   | chr17:7577118 | SNV   | C    | 1      | C/A      | 5.01E-07 | 1318     | 1093,225        | exonic   | missense                 | TTT   | 8    | p.Val274Phe |
| 28   | chr17:7577523 | SNV   | G    | 1      | G/A      | 2.00E-08 | 1996     | 1435,561        | exonic   | missense                 | ATC   | 7    | p.Thr253Ile |
|      | chr17:7578380 | SNV   | C    | 1      | C/G      | 6.31E-07 | 1993     | 1433,560        | exonic   | missense                 | CAT   | 5    | p.Asp184His |
|      | chr17:7578526 | SNV   | C    | 1      | C/A      | 2.51E-07 | 1955     | 1343,612        | exonic   | missense                 | TTC   | 5    | p.Cys135Phe |
| 29   | chr17:7576867 | INDEL | AT   | 1      | AT/A     | 6.31E-08 | 1995     | 1268,727        | exonic   | frame shift deletion     | GAT   | 9    | p.Glu326fs* |
|      | chr17:7578196 | SNV   | A    | 1      | A/T      | 6.31E-08 | 1996     | 1271,725        | exonic   | missense                 | GAG   | 6    | p.Val218Glu |
| 30   | chr17:7578406 | SNV   | C    | 1      | C/T      | 5.01E-05 | 795      | 524271          | exonic   | missense                 | CAC   | 5    | p.Arg175His |
| 31   | chr17:7577121 | SNV   | G    | 1      | G/A      | 6.31E-07 | 609      | 589,20          | exonic   | missense                 | TGT   | 8    | p.Arg273Cys |
|      | chr17:7577518 | SNV   | T    | 1      | T/A      | 7.94E-09 | 1994     | 1272,722        | exonic   | missense                 | TTC   | 7    | p.Ile255Phe |
|      | chr17:7578475 | SNV   | G    | 1      | G/A      | 5.01E-06 | 716      | 555,161         | exonic   | missense                 | CTG   | 5    | p.Pro152Leu |
|      | chr17:7579869 | SNV   | C    | 1      | C/A      | 2.51E-06 | 1757     | 1455,302        | exonic   | missense                 | ATT   | 2    | p.Ser15Ile  |
| 32   | chr17:7577094 | SNV   | G    | 1      | G/A      | 6.31E-07 | 737      | 245,492         | exonic   | missense                 | TGG   | 8    | p.Arg282Trp |
| 33   | chr17:7578212 | SNV   | G    | 1      | G/A      | 1.00E-05 | 1997     | 265,1732        | exonic   | nonsense                 | TGA   | 6    | p.Arg213Ter |

(Continued)

| case | locus         | type  | ref | length | genotype | p value  | coverage | allele coverage | location | function             | codon | exon | protein     |
|------|---------------|-------|-----|--------|----------|----------|----------|-----------------|----------|----------------------|-------|------|-------------|
| 34   | chr17:7578203 | SNV   | C   | 1      | C/T      | 6.31E-07 | 554      | 522,32          | exonic   | missense             | ATG   | 6    | p.Val216Met |
|      | chr17:7578548 | SNV   | G   | 1      | G/A      | 3.16E-07 | 213      | 186,27          | exonic   | missense             | TCT   | 5    | p.Pro128Ser |
|      | chr17:7579408 | INDEL | CA  | 1      | CA/C     | 5.01E-07 | 1951     | 1188,763        | exonic   | frame shift deletion | CGT   | 4    | p.Leu93fs*  |

\*fs: insert or deletion mutation
